# Supplementary material for: Strain sensing multi-stimuli responsive light emitting lanthanide-based tough and stretchable hydrogels with tunable luminescence and fast self-recovery using metal–ligand and hydrophobic interactions
Source: Royal Society of Chemistry journal article supplement (doi:10.1039/d2nj05263f), 2023-01-01
Supplement: d2nj05263f1.pdf [file d2nj05263f1.pdf]

Electronic Supplementary Information (ESI) for New Journal of Chemistry

## **Strain sensing multi-stimuli responsive light emitting lanthanide-based hydrogels with tunable luminescence and fast self-recovery using metal-ligand and hydrophobic interaction.**

### **SUPPORTING INFORMATION: ESI**

**Prachishree Panda<sup>1</sup>, Agniva Dutta<sup>1</sup>, Sourabh Pal<sup>2</sup>, Debabrata Ganguly<sup>3</sup>, Santanu**

**Chattopadhyay<sup>3</sup>, Narayan Chandra Das<sup>3</sup>, Rajat K. Das\*<sup>1</sup>**

<sup>1</sup>Materials Science Centre, Indian Institute of Technology Kharagpur, Kharagpur, India

<sup>2</sup>Advanced Technology Development Centre, Indian Institute of Technology Kharagpur, Kharagpur, India

<sup>3</sup>Rubber Technology Centre, Indian Institute of Technology Kharagpur, Kharagpur, India

#### **Correspondence**

Rajat K. Das, Materials Science Centre, Indian Institute of Technology Kharagpur, Kharagpur, West Bengal 721302, India.

Email: [rajat@matsc.iitkgp.ac.in](mailto:rajat@matsc.iitkgp.ac.in)

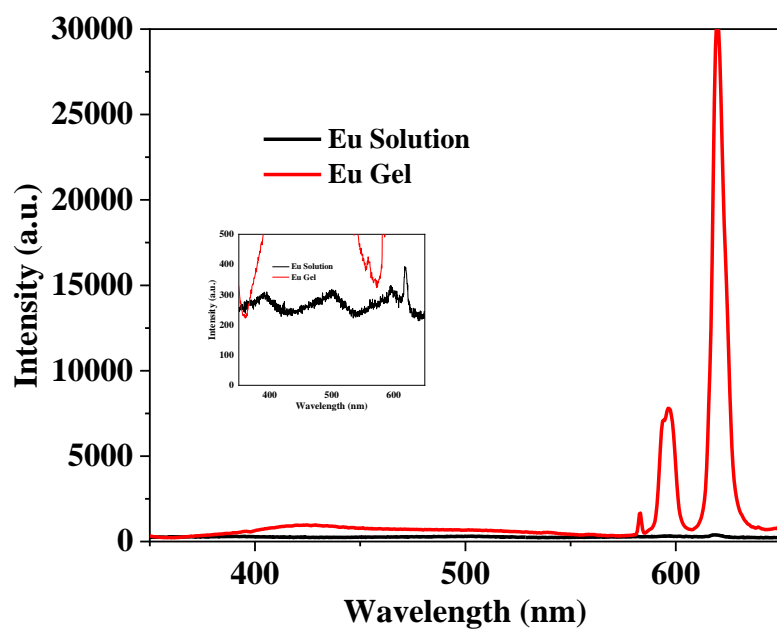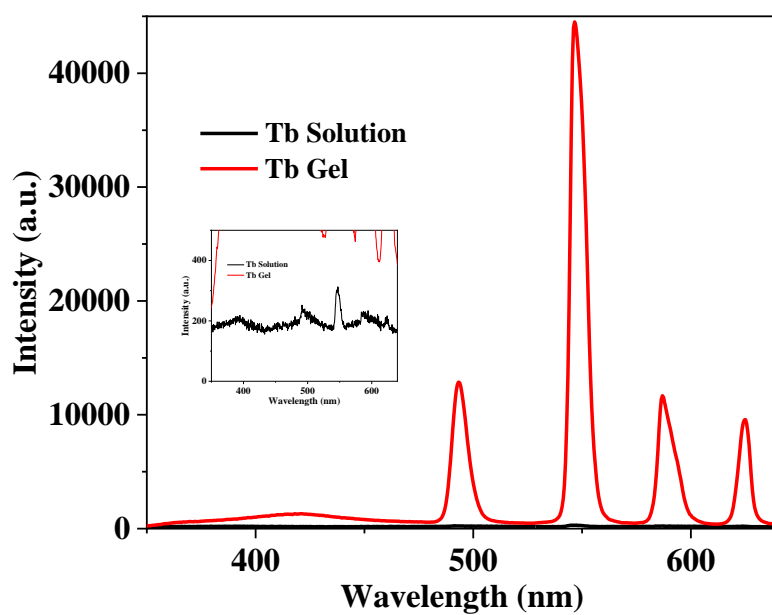

**Figure S1.** Emission spectra ( $\lambda_{exc} = 330$  nm) of the system in gel and solution state.

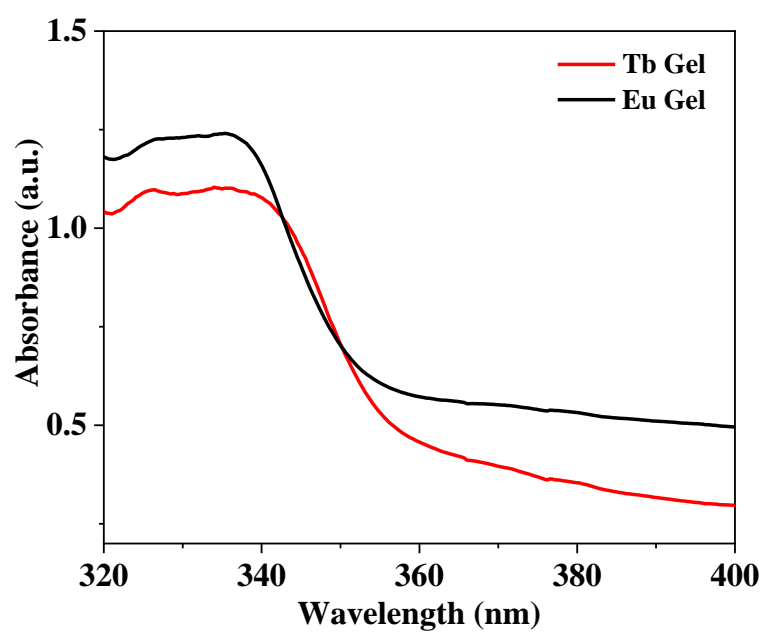

**Figure S2.** UV-vis absorption spectra of hydrogels.

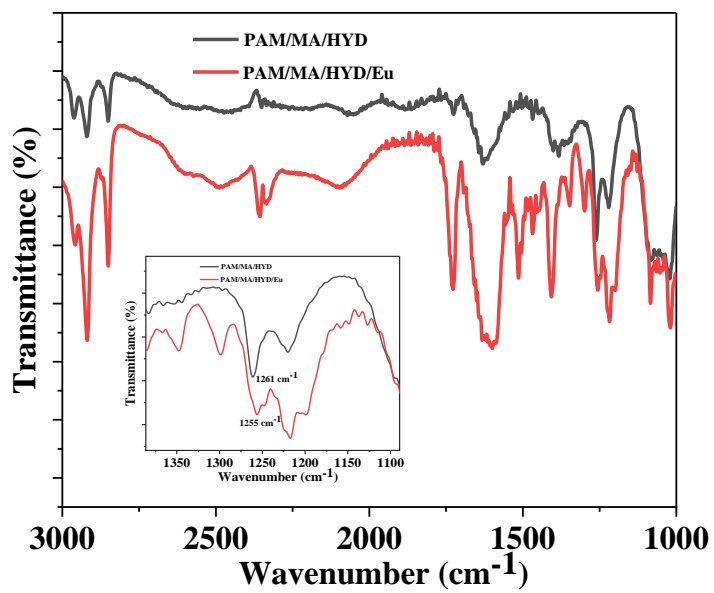

**Figure S3.** FTIR spectra of hydrogel in absence (black) and in the presence of Eu<sup>3+</sup> ion.

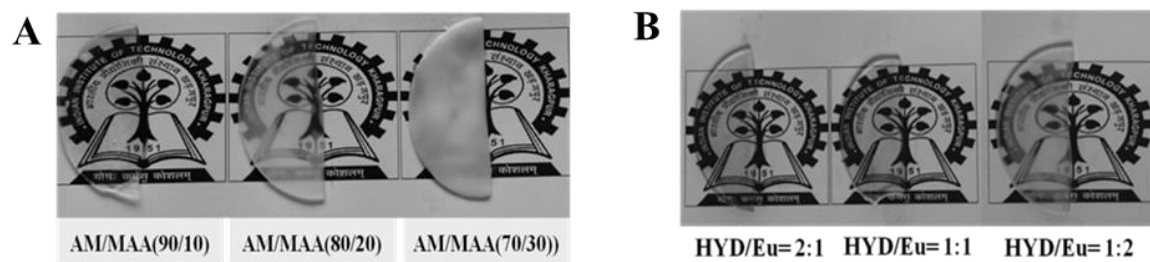

**Figure S4.** (A) Appearance of hydrogel samples synthesized with different ratio of methacrylic acid to acrylamide, (B) Appearance of hydrogel samples synthesized with different ratio of hydrophobe to lanthanide ion ( $\text{Eu}^{3+}$ ).

**Table S1. Mechanical parameters of the hydrogel with different AM/MA ratio in presence of Ln<sup>3+</sup> ion (Eu<sup>3+</sup>).**

| AM/MA<br>(Ratio) | Ultimate<br>Stress<br>(kPa) | Strain<br>(%) | Stiffness<br>(kPa) | Toughness<br>(kJ/m <sup>3</sup> ) |
|------------------|-----------------------------|---------------|--------------------|-----------------------------------|
| 90/10            | 134.8±3.44                  | 560.27±74.3   | 47.14±4.13         | 844.14±65.57                      |
| 80/20            | 156.04±4.95                 | 479.88±56.16  | 50.19±5.3          | 321.57+/-21.64                    |
| 70/30            | 200±2.89                    | 488.99±19.25  | 53.55±1.13         | 403.16±18.27                      |
| 100/0            | 42.38±10                    | 612.38±51.32  | 18.23±2.65         | 145.65±37.7                       |

**Table S2. Mechanical parameters of the hydrogel with different Hydrophobe to Ln<sup>3+</sup> (Eu<sup>3+</sup>) ratio.**

| Hydrophobe/Ion | Ultimate tensile<br>stress (kPa) | Strain (%)   | Stiffness (kPa) | Toughness<br>(kJ/m <sup>3</sup> ) |
|----------------|----------------------------------|--------------|-----------------|-----------------------------------|
| 1:2            | 484.8±5.6                        | 562.68±96.6  | 136.98±15.5     | 1164±15.8                         |
| 1:1            | 250.5±7.8                        | 591.28±20.47 | 93.76±22.8      | 807.5±81.3                        |
| 2:1            | 134.8±3.44                       | 560.27±74.32 | 47.14±4.13      | 844.1±65.5                        |

**Table S3. Mechanical parameters of the hydrogel with different Hydrophobe concentrations.**

| Samples     | Ultimate tensile<br>stress (kPa) | Strain (%)   | Stiffness (kPa) | Toughness<br>(kJ/m <sup>3</sup> ) |
|-------------|----------------------------------|--------------|-----------------|-----------------------------------|
| 0.2 Hyd/ Eu | 130.48±0.14                      | 532.43±40.24 | 36.505±3.16     | 293.32±18.75                      |
| 0.5 Hyd/Eu  | 484.8±5.6                        | 562.68±96.6  | 136.98±15.5     | 1164±15.8                         |
| 1.0 Hyd/Eu  | 269.15±5.01                      | 331.25±17.61 | 145.47±18.89    | 433.5±4.45                        |

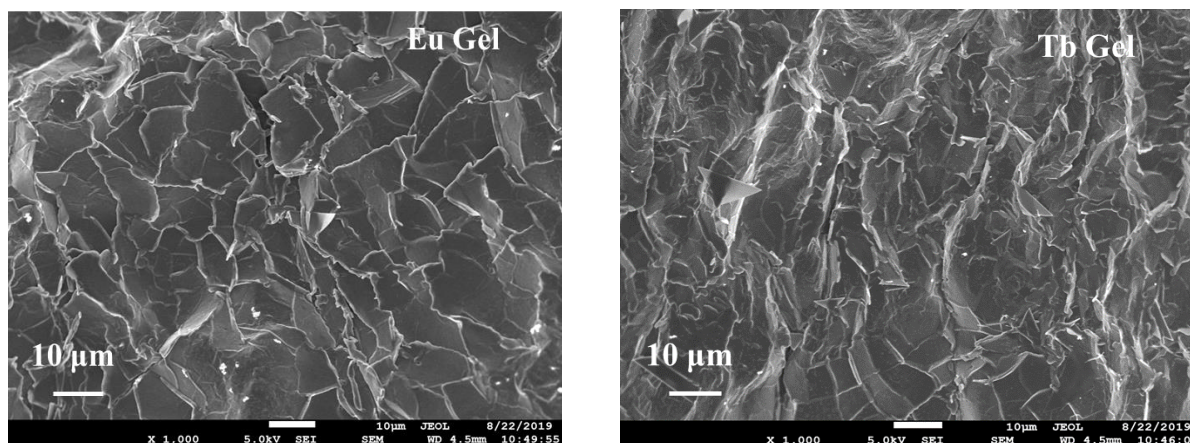

**Figure S5.** FESEM images of  $\text{Eu}^{3+}$  and  $\text{Tb}^{3+}$  hydrogels.

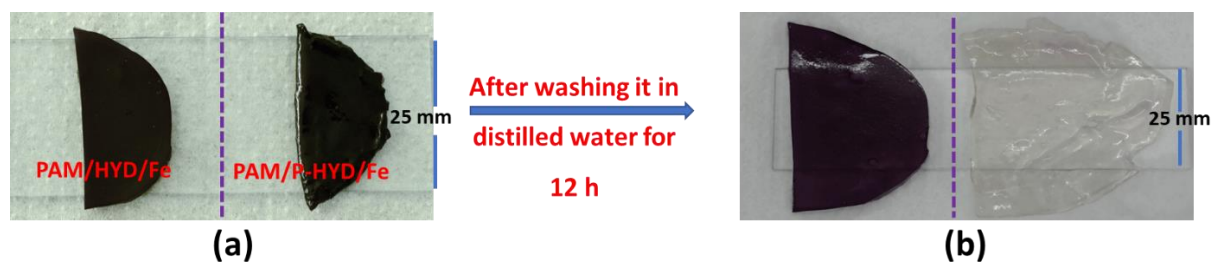

**Figure S6.** Pictures of PAM/HYD/Fe and PAM/P-HYD/Fe gels films (A) as prepared, (B) after washing in distilled water for 12 h.



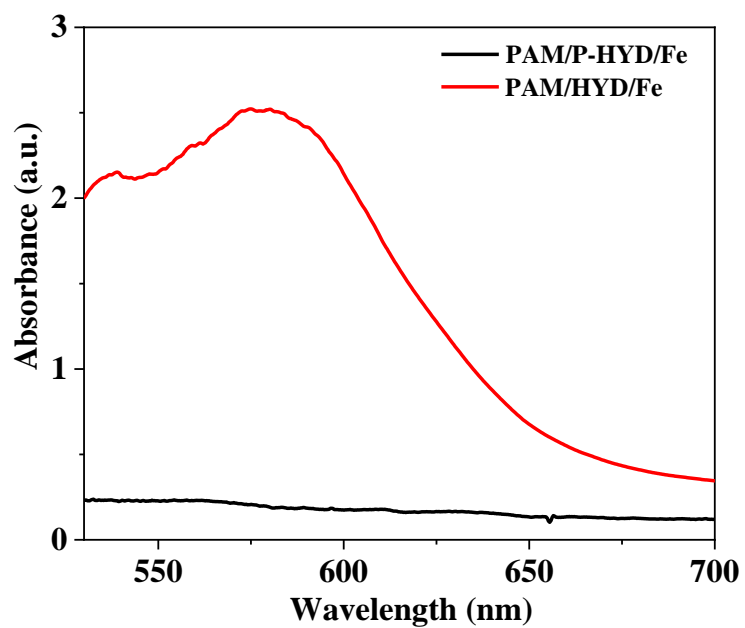

**Figure S7.** The absorption spectra of air-dried hydrogels of PAM/P-HYD/Fe (black) and PAM/HYD/Fe (red).

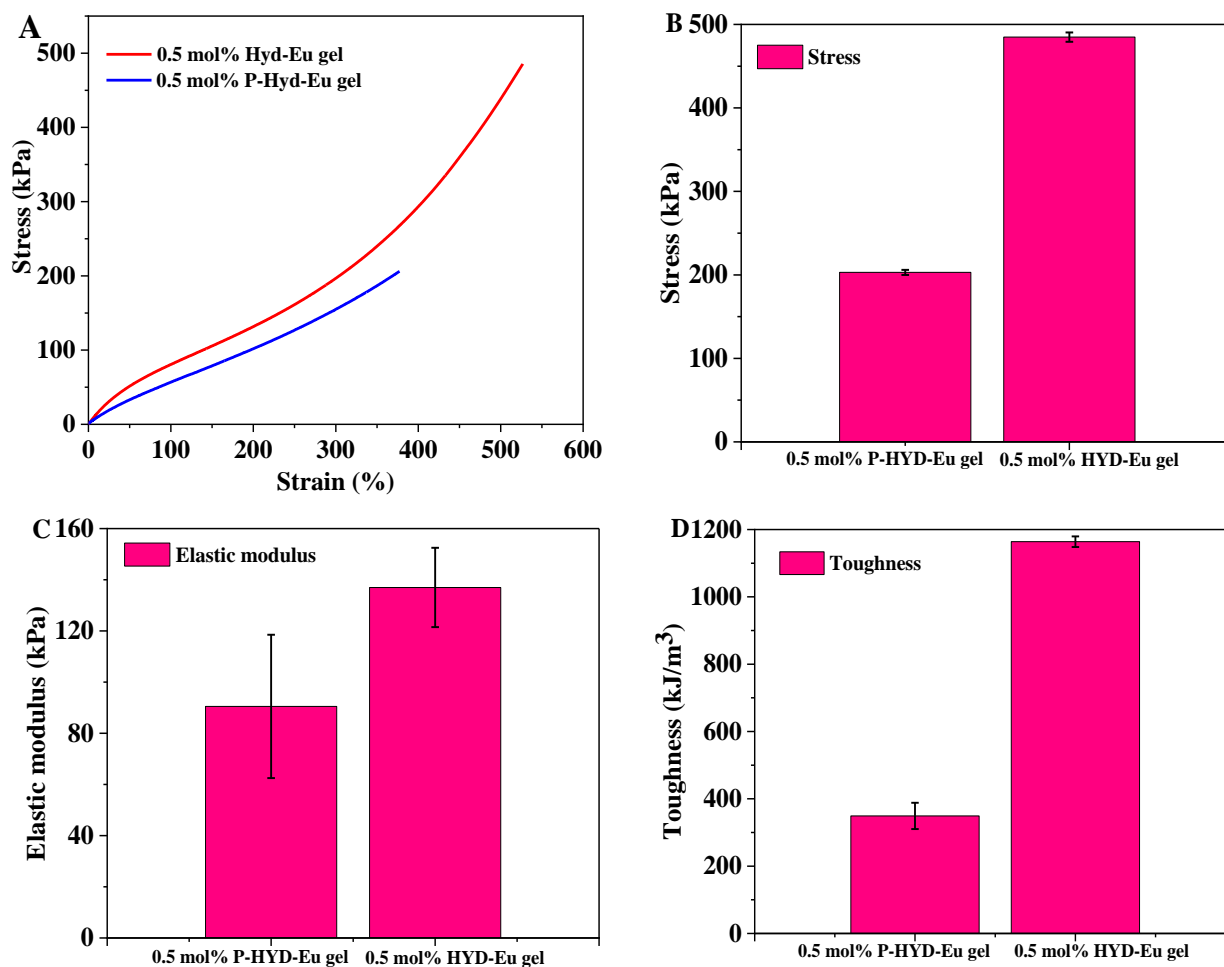

**Figure S8.** Tensile stress-strain graph for 0.5 mol% P-HYD-Eu gel and 0.5 mol% HYD-Eu gel. Comparative study for (B) stress, (C) elastic modulus and (D) toughness. Error bars represent standard deviations from the mean ( $n = 3$ ).

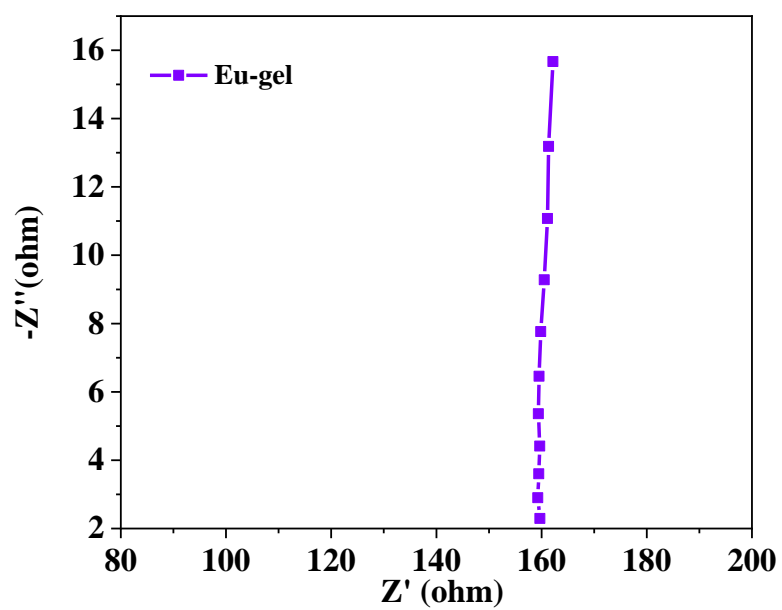

**Figure S9.** Nyquist plot of Eu hydrogel.

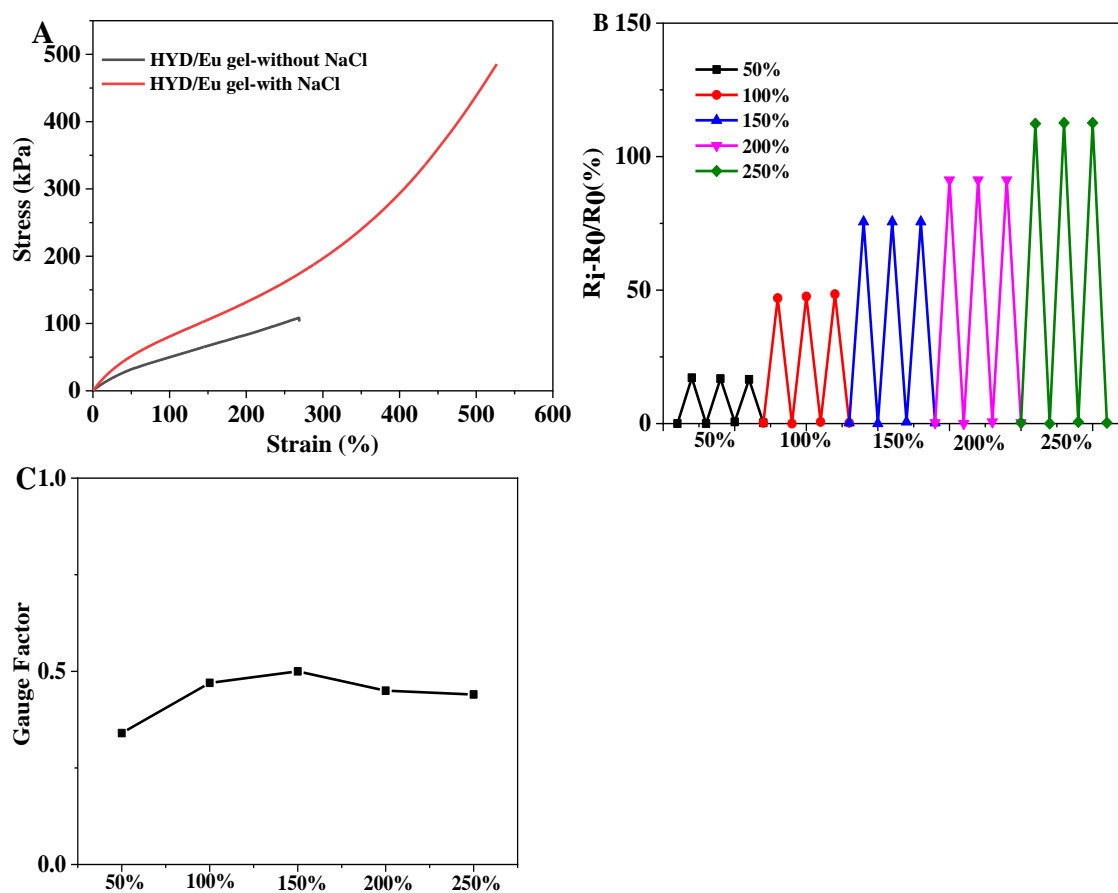

**Figure S10.** For the  $\text{Eu}^{3+}$  hydrogel prepared in the absence of NaCl: (A) Tensile stress-strain experiment, (B) relative resistance change % by repeated tensile loading-unloading to different strains, (C) Gauge factor using hydrogel based resistive sensor.
